# Supplementary material for: Crystal defect-mediated band-gap engineering: a new strategy for tuning the optical properties of Ag2Se quantum dots toward enhanced hydrogen evolution performance
Source: Royal Society of Chemistry journal article supplement (doi:10.1039/c5ta04978d), 2015-01-01
Supplement: c5ta04978d1.pdf [file c5ta04978d1.pdf]

## Supplementary Information

### **Crystal defects-mediated band-gap engineering: A new strategy for tuning optical properties of Ag<sub>2</sub>Se quantum dots toward enhanced hydrogen evolution performance**

*Qi Cao,<sup>†,§,#</sup> Yi-Feng Cheng,<sup>†</sup> Han Bi,<sup>†</sup> Xuebing Zhao,<sup>†</sup> Kaiping Yuan,<sup>†</sup> Qinghe Liu,<sup>†</sup>  
Qingqing Li,<sup>†</sup> Min Wang,<sup>†</sup> and Renchao Che<sup>\*,†</sup>*

*<sup>†</sup> Laboratory of Advanced Materials, Department of Materials Science, Collaborative Innovation Center of Chemistry for Energy Materials, Fudan University, Shanghai 200438, People's Republic of China*

*<sup>§</sup> School of Engineering, The University of Tokyo, 7-3-1 Hongo, Bunkyo-ku, Tokyo 113-8656, Japan*

*<sup>#</sup> Institute of Ion Beam Physics and Materials Research, Helmholtz-Zentrum Dresden-Rossendorf, Bautzner Landstraße 400, 01328 Dresden, Germany*

\* Corresponding author: [rcche@fudan.edu.cn](mailto:rcche@fudan.edu.cn)

This file contains:

Experimental details and supplementary Figures S1–S2.

## Experimental details

**Materials and chemicals.** Silver nitrate ( $\text{AgNO}_3$ , 99.98%),  $\text{Na}_2\text{SO}_3$  (> 97%), n-hexane (AR), absolute ethanol (GR), methanol (AR) and dichloromethane (AR) were purchased from Sinopharm Chemical Reagent Company. 3-mercaptopropionic acid (3-MPA, 99%) was purchased from Alfa-Aesar Company. Selenium powder (Se, 99.99%) and octadecylamine (ODA, > 97%) were obtained from Sigma-Aldrich Company. Toluene (> 99.85%, Extra Dry) was obtained from Arcos Organics Company. P25- $\text{TiO}_2$  powder (a mixed phase of 70% anatase and 30% rutile) was bought from Evonik-Degussa and 3-aminopropyltriethoxysilane (APTES, 98%) from Fluka. All chemicals were used just as received without further purification, and in all experiments, extremely pure deionized water (DI water, Millipore) with the resistivity greater than  $18.0 \text{ M}\Omega \cdot \text{cm}$  was used.

**Synthesis of defects-rich silver nanocrystals.** Silver nanocrystals were prepared according to a published report (*J. Am. Chem. Soc.*, 2008, **130**, 4016-4022.). Briefly,  $\text{AgNO}_3$  (0.5 g) was added to the solvent ODA (10 mL) at  $180^\circ\text{C}$  and stirred for 10 min in air. In order to generate considerable amount of crystal defects in silver nanocrystals, thermal vibrations between  $170^\circ\text{C}$  to  $190^\circ\text{C}$  were introduced during synthesis and kept for 1, 3, 5 and 7 min respectively during the 10 min reaction. After the reaction finished and cooled down to room temperature, the resulting products were collected at the bottom of the flask (50 mL) and washed by addition of ethanol and n-hexane accompanied by centrifugation for several times.

**Synthesis of defects-rich  $\text{Ag}_2\text{Se}$  QDs and ligand exchange.**  $\text{Na}_2\text{SeSO}_3$  aqueous solution (0.1 M) was prepared at first using a published method (*Chem. Eur. J.*, 2006, **12**, 3672-3677.). In a typical process, the obtained silver nanocrystals (1 mmol), 3-MPA (5 mmol) and deionized water (10 mL) were mixed in a 50 mL three-necked flask and heated under continuous stirring to  $90^\circ\text{C}$  for 15 min in air. Then 5 mL of the  $\text{Na}_2\text{SeSO}_3$  solution (heated and maintained at  $95^\circ\text{C}$  in advance) was quickly injected into the flask and kept for another 30 min. During the 30 min selenylation reaction, thermal vibrations between  $80^\circ\text{C}$  to  $98^\circ\text{C}$  were introduced again and kept for 5, 10, 15 and 20 min respectively. After the reaction finished and cooled down naturally to room temperature, the resulting products were washed

and collected by addition of ethanol and deionized water accompanied by centrifugation for several times.

***Estimation of the percentage of defects in as-obtained Ag<sub>2</sub>Se QDs.*** Basically, based on the imaging mechanism of diffraction contrast by transmission electron microscope (TEM), crystal defects in as-synthesized Ag<sub>2</sub>Se QDs can be identified. Generally, the crystal defect acts as a strain center for scattering the incident electron beam, therefore contributes different contrast compared to defect-free region. Around the defective region, atoms deviate away from their original positions somehow, thus form a strain field locally. And when the incident beam propagates such a strained region, various diffraction contrast might be formed due to the strained crystal planes. As a result, defective structures like twins and stacking faults could be observed clearly in TEM images. Particularly in our experiments, we chose appropriate magnifications which were neither too high nor too low and approximated to 100k – 200k, to record TEM patterns. In this way, both easy identification of crystal defects and a considerable amount of particles in one image could be achieved at the same time. Afterward, for each sample, we statistically examined five TEM patterns (each image contains at least 20 QDs, thus at least 100 QDs in total) to know the approximate percentage of the Ag<sub>2</sub>Se QDs containing crystal defects.

***Surface modification of as-purchased P25-TiO<sub>2</sub>.*** The surface amination of as-purchased P25-TiO<sub>2</sub> powder with APTES was first conducted *via* a post-synthesis grafting method (*Catal. Today*, 2015, **250**, 218-225.). Typically, 0.005 mmol of APTES was dissolved in dry toluene to form a clear solution. Next, 1.5 g of P25-TiO<sub>2</sub> was dispersed in 25 mL of APTES solution within a Teflon reactor and stirred for 15 min. The suspension was then sealed and heated at 100 °C for 8 h. After the reaction finished, the resulting powders were filtered, washed with dry toluene and dichloromethane for several times, and dried in the oven at 110 °C for 12 h.

***Deposition of Ag<sub>2</sub>Se QDs on surfaces of TiO<sub>2</sub>.*** Briefly, 0.02 g of 3-MPA capped crystal defects-rich Ag<sub>2</sub>Se QDs (2 wt%) and 0.98 g of APTES-functionalized P25-TiO<sub>2</sub> were dispersed in 200 mL of deionized water and magnetically stirred for about 24 h under room

temperature. Afterwards, the resulting product was washed and centrifugated with deionized water for several times, and dried in the oven overnight.

***Photocatalytic hydrogen evolution from water splitting.*** The evaluation of photocatalytic hydrogen evolution performance was carried out utilizing a photocatalytic evaluation system (Labsolar-IIIAG, Perfect-Light Company, Beijing) with the Xe lamp irradiation ( $\lambda > 420$  nm, 300 W) and a gas chromatograph (GC-7900, Techcomp, Shanghai) at room temperature. The GC-7900 system exploits a thermal conductivity detector (TCD) and the ultrahigh-purity N<sub>2</sub> as the carrier gas. In a typical procedure, 0.1 g of the Ag<sub>2</sub>Se-TiO<sub>2</sub> photocatalysts were dispersed in mixed solution of methanol (50 mL) and deionized water (150 mL) under continuous visible light irradiation and magnetically stirring. Besides, reference experiments were also performed without photocatalysts in the presence of light and with photocatalysts in the dark. Nevertheless in both cases, no production of hydrogen gas was observed.

***Characterization.*** Transmission electron microscopy (TEM) and high-resolution TEM (HRTEM) images were recorded with a field-emission transmission electron microscope (FE-TEM, JEOL JEM-2100F, Japan) equipped with a post-column Gatan imaging filter system (GIF, Tridium 863, United States) working at 200 kV of the acceleration voltage. The off-axis electron holography analysis and geometric phase analysis (GPA) were carried out using Gatan-DigitalMicrograph<sup>®</sup> software (version 1.71.38). Powder X-ray diffraction (XRD) patterns were collected with a powder X-ray diffractometer (D8-Advance, Bruker, Germany) working with Cu-K $\alpha$  radiation (1.5406 Å) at 40 mA and 40 kV. The near-infrared (NIR) photoluminescent spectra were recorded using a homemade device with a Princeton NIR-CCD as the detector and an 808 nm laser as the excitation source.

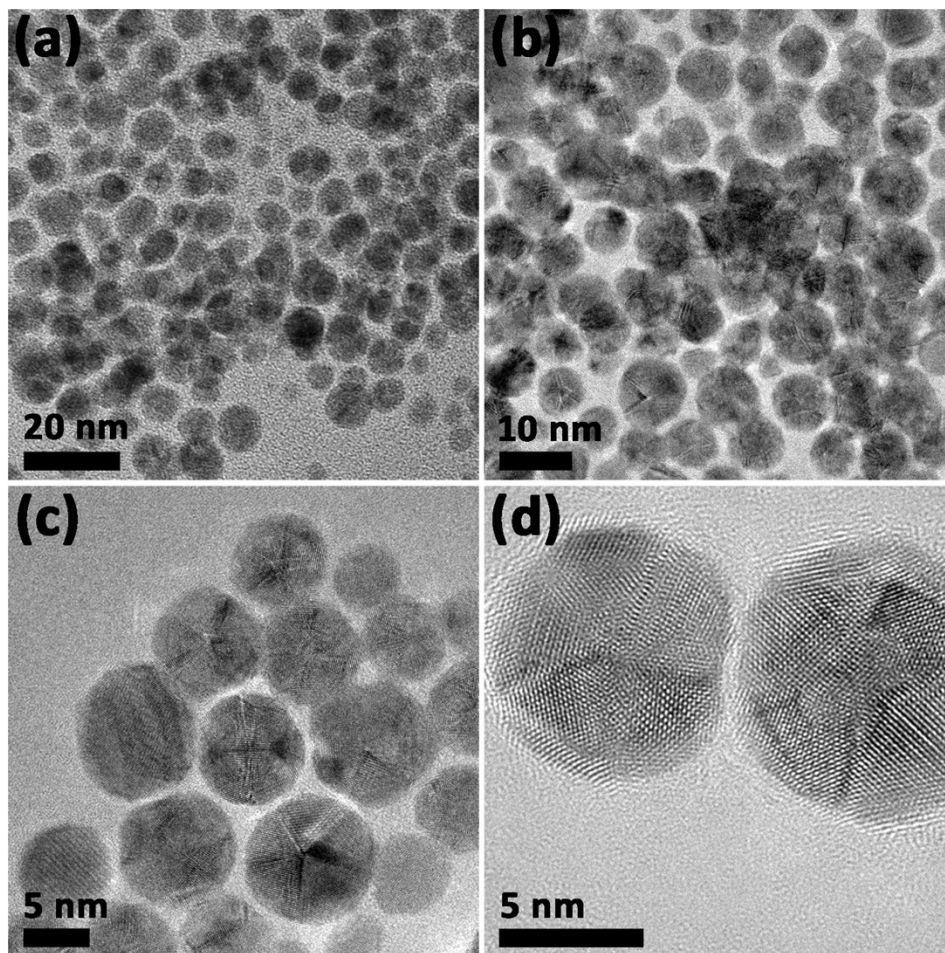

**Figure S1.** Representative (a-c) TEM and (d) HRTEM images of the crystal defects-rich  $\text{Ag}_2\text{Se}$  nanocrystals recorded under different magnifications.

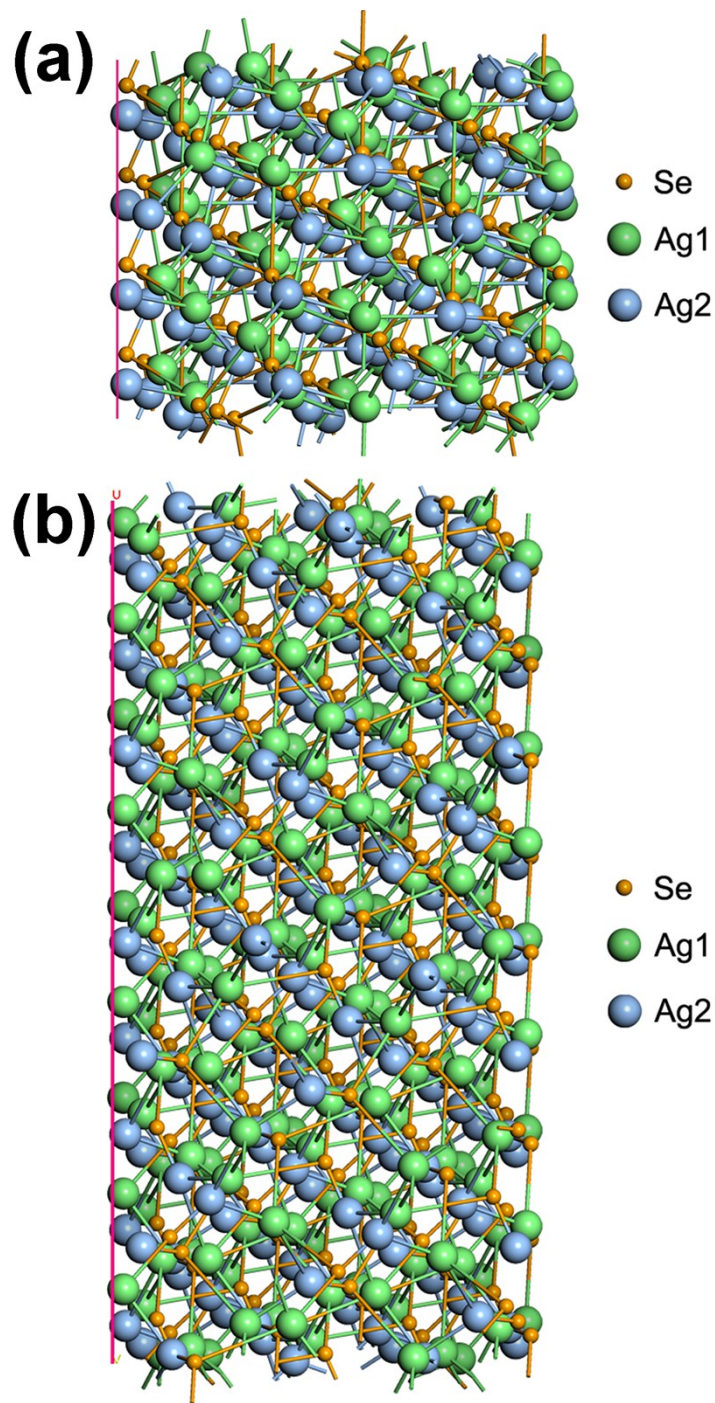

**Figure S2.** Two representative crystal-structure projections along the  $[001]$  zone axis. The red lines on the left in panel (a) and (b) represent the projections of  $(2\ 2)$  and  $(2\ 0\ 1)$  twin planes observed in the HRTEM images of Figure 2a–b of the manuscript, respectively.
